# Supplementary material for: The relationship between mitochondrial DNA haplotype and the reproductive capacity of domestic pigs (Sus scrofa domesticus)
Source: PubMed Central journal article supplement (PMC4870755; doi:10.1186/s12863-016-0375-4), 2016-05-18

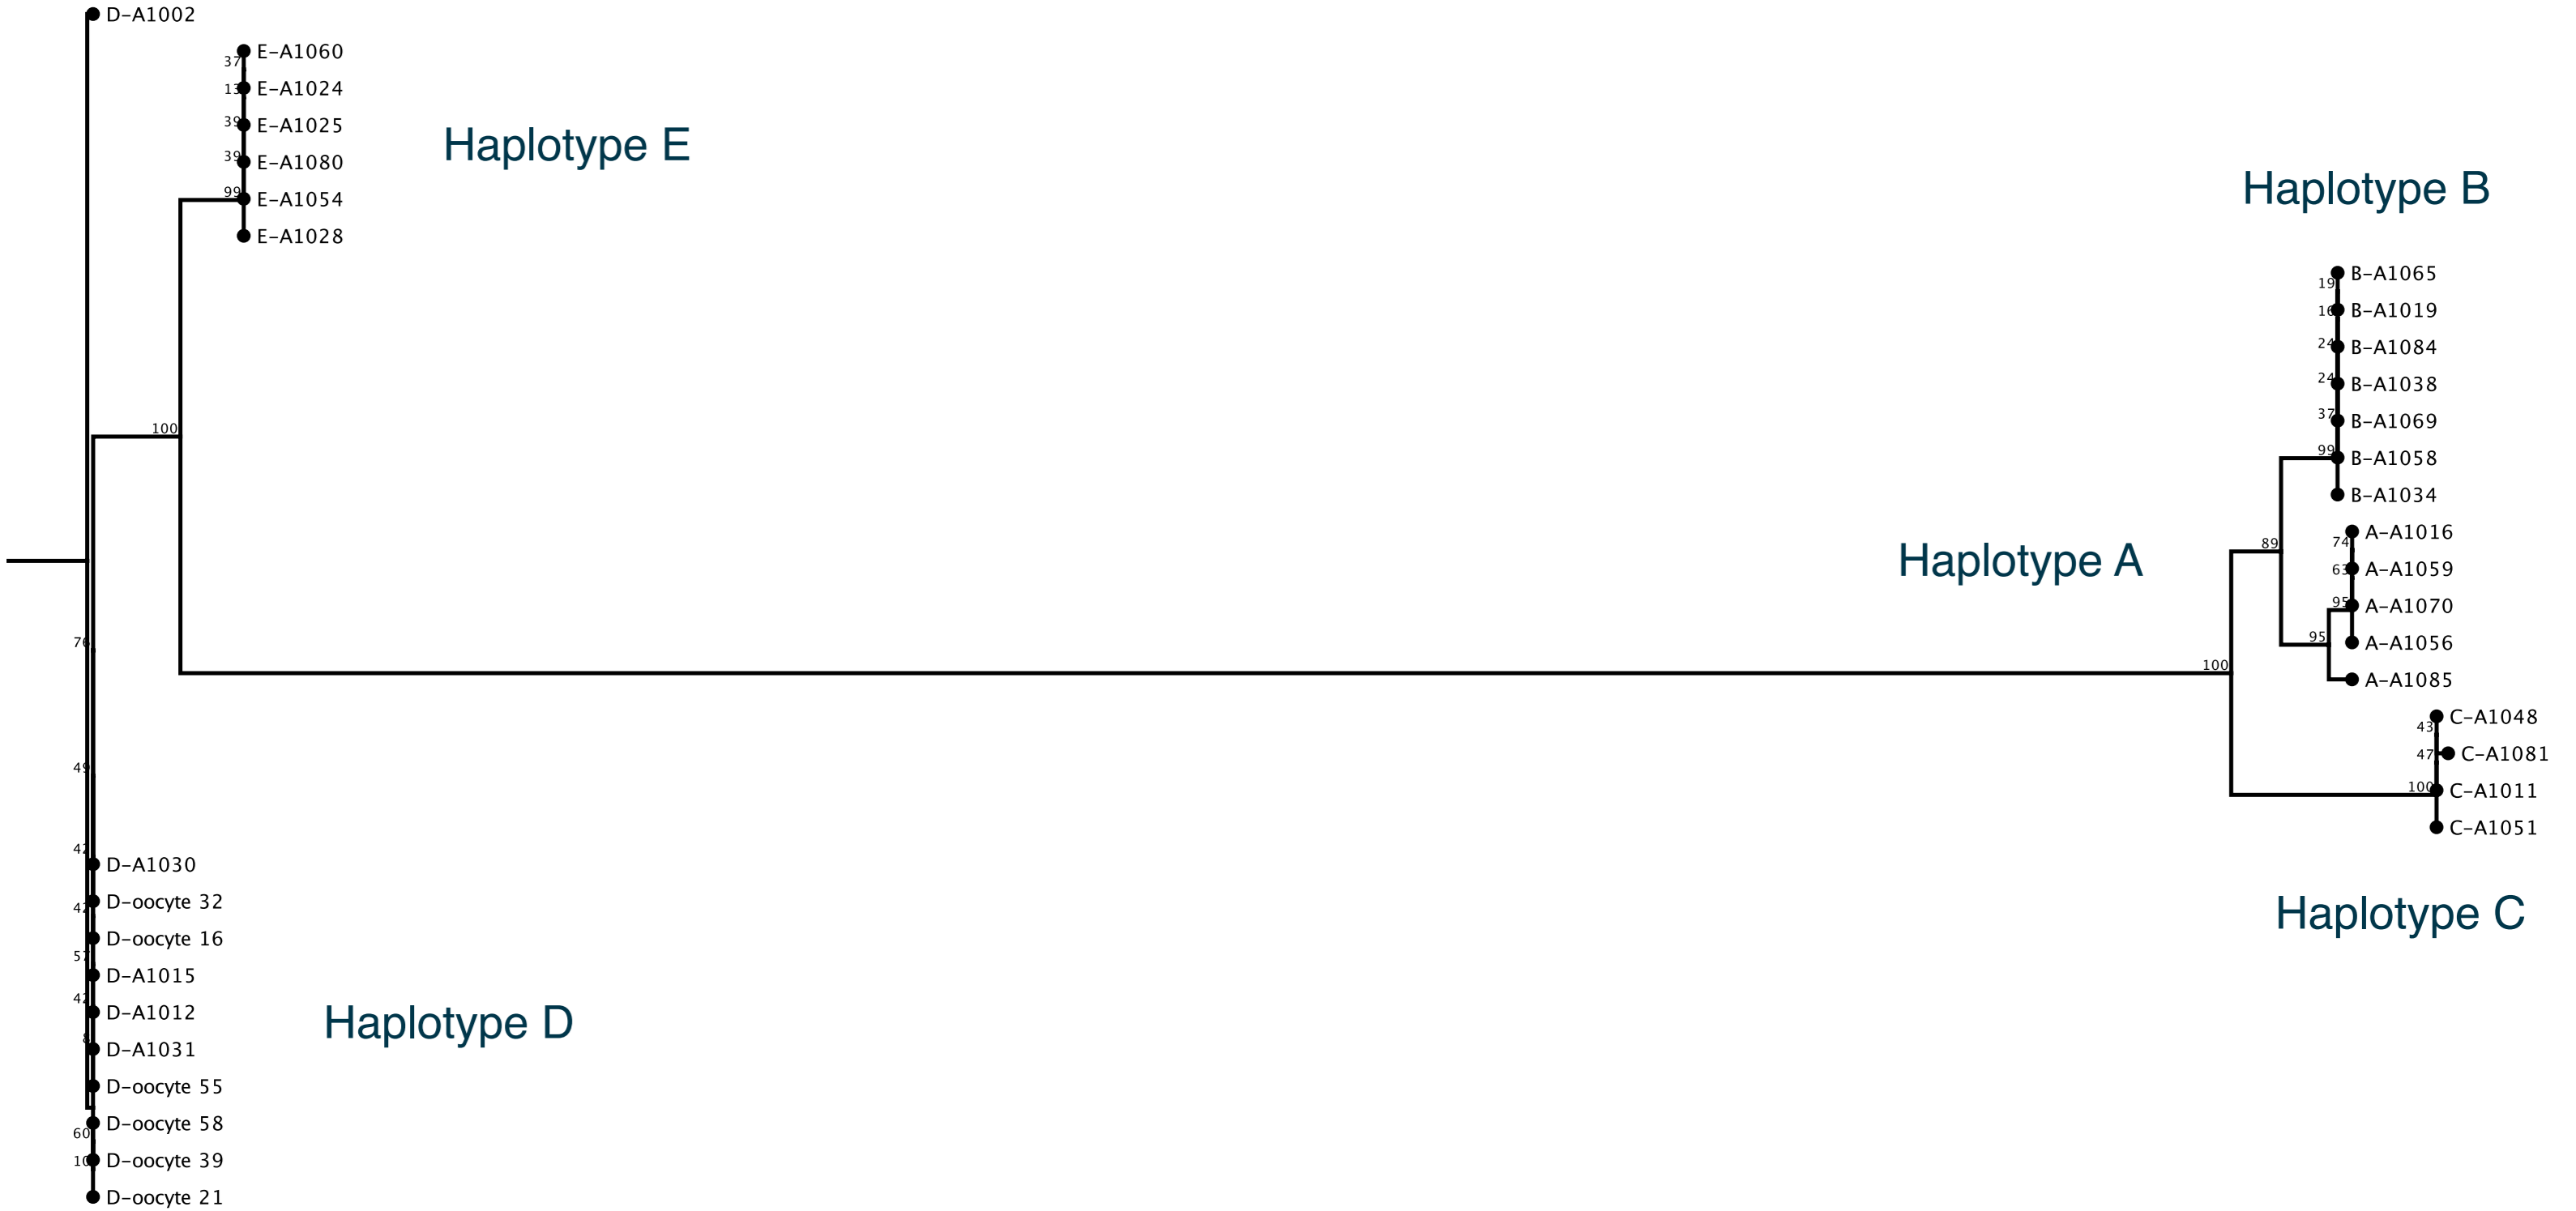

Supplement: 12863_2016_375_MOESM3_ESM.pdf [file 12863_2016_375_MOESM3_ESM.pdf]
